EDITORIAL

# Multimorbidity: Addressing the next global pandemic

The PLOS Medicine Editors\*

Public Library of Science, San Francisco, California, United States of America and Cambridge, United Kingdom

\* [medicine\\_editors@plos.org](mailto:medicine_editors@plos.org)

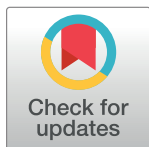

## OPEN ACCESS

**Citation:** The PLOS Medicine Editors (2023) Multimorbidity: Addressing the next global pandemic. PLoS Med 20(4): e1004229. <https://doi.org/10.1371/journal.pmed.1004229>

**Published:** April 4, 2023

**Copyright:** © 2023 The PLOS Medicine Editors. This is an open access article distributed under the terms of the [Creative Commons Attribution License](#), which permits unrestricted use, distribution, and reproduction in any medium, provided the original author and source are credited.

**Funding:** The author(s) received no specific funding for this work.

**Competing interests:** The authors' individual competing interests are at <http://journals.plos.org/plosmedicine/s/staff-editors>. PLOS is funded partly through manuscript publication charges, but the PLOS Medicine Editors are paid a fixed salary (their salaries are not linked to the number of papers published in the journal). Till Bärnighausen is the Academic Editor-in-chief of PLOS Medicine.

The PLOS Medicine Editors are Till Bärnighausen, Callam Davidson, Philippa Dodd, Louise Gaynor-Brook, Katrien Janin and Alexandra Schaefer.

Advances in translational scientific research and modern medicine have enabled substantial progress to be made in clinical practices around the world. And, while there are no doubts that inequities persist, these advances have contributed to significant improvements in life expectancy globally. It may come as no surprise, considering the advances made, that the number of people being diagnosed as multimorbid—with two or more chronic conditions, either physical, mental or both—has also progressively increased.

In low- and middle-income countries (LMICs) the problem is ever more palpable. Plagued by inequitable access to research facilities, healthcare services, diagnostics, therapeutics and effective policy implementation, progress lags far behind that of high-income countries (HICs). Not only is there a disproportionately high prevalence of chronic multisystem infectious diseases, such as HIV and TB, the prevalence of non-communicable conditions, such as hypertension and diabetes, have also increased over the preceding decades [1].

Historically, in many HICs multimorbidity has been attributed to advancing age [2]. While this has been and will continue to be one of the primary drivers of multimorbidity, other socioeconomic and structural factors—such as income, education, and location—contribute significantly to an individual's likelihood of being diagnosed with multiple conditions. As a result, in socioeconomically deprived regions, multimorbidity is becoming increasingly evident in younger populations [3]. The emergence of COVID-19 and the consequence now known as “long-COVID” which affects multiple organ systems simultaneously, as well as numerous other conditions, such as HIV infection, multisystem autoimmune conditions, cancer, diabetes, and mental ill-health have further highlighted the age indiscriminate nature of multimorbidity.

How individual conditions should be managed in tandem with others, and by whom, is often at the heart of the debate when putting the theoretical management of multimorbid patients into practice. It is frequently the case that, at least in the initial stages of multimorbidity manifestation, the contribution of each individual condition is minimal or limited while the cumulative effect of the conditions combined pose a major problem, not only to the patient but also to individual caregivers. Medical anthropologists have proposed the theory of “syndemics” in which diseases are hypothesized to cluster and to interact with one another (the biological–biological interface) as well as with social and structural factors (the biological–social interface) [4]. This clustering of conditions is often considered predictable, for example obesity, diabetes, and hypertension. However, syndemic clusters have usually been observed in inductive studies, and empirical research has revealed unexpected clustering of chronic conditions, such as the extremely high prevalence of cardiovascular disease seen in younger adults living with HIV.

Who leads patient care is often determined by which of the co-existing conditions is most complex to manage, thus defaulting to that specialist caregiver. The reality is that diverse

expertise is required for effective management of multimorbid individuals. In low-income settings, the basic lack of healthcare workers poses the single largest barrier to effective healthcare implementation. In high-income settings, excellent vertically specialized healthcare systems for individual conditions usually exist with different providers for kidney disease, heart disease, diabetes, and mental health. Nevertheless, integrating care across many medical specialties and individual providers has proved challenging and evidence would suggest that healthcare systems are failing to deliver for these patients [5]. If success is to be achieved anywhere, of primary importance is a standardized approach to multimorbidity.

A plethora of differing approaches to measuring and calculating multimorbidity, based on the co-existence of several different conditions and combinations thereof, have been proposed by multimorbidity researchers over the years [6,7]. As a result of this heterogeneity, wide disparities exist in the reported prevalence of multimorbidity [8], as well as the cost implications, across the globe. Without a consistent approach to defining multimorbidity, determining those at highest risk and establishing true prevalence becomes nigh on impossible, the downstream effect of which is an inability for policy makers to direct adequate resources for either its prevention or effective management.

Approaching multimorbidity via individual conditions culminates in increased healthcare utilization and expenditure. Current data estimate that healthcare costs are significantly higher when treating multimorbid individuals and that, with certain combinations of co-existing conditions, costs may be higher still [9]. Excess expenditure has been attributed to a variety of factors including duplicated appointments and investigations across both primary and secondary care, and increased attendance at emergency departments [10], all without clear evidence of improvement to patients' quality of life or physical health outcomes. Multimorbidity is a major driver of polypharmacy and the associated negative consequences for patients and healthcare systems including adverse drug events, hospital readmissions and even mortality [11]. Given the current global economic climate, maximizing the use of available resources should be a collective priority. A joined-up, multidisciplinary, structured approach to care for multimorbid patients is undoubtedly required and integration of care pathways which involve a diversity of specialist expertise are strongly supported in some circumstances [12]. Theoretically, primary care should serve to integrate diverse involvements by direct engagement with patients. However, considering the paradigm shift towards multimorbidity, arguments certainly exist in favor of ensuring that healthcare professionals obtain and nurture core generalist skills alongside specialist skills to facilitate complete and holistic caregiving in the face of multimorbidity [13].

The way clinical research is approached must also be carefully considered. Currently, evidence obtained through randomized controlled trials is considered poorly applicable to multimorbid patients because of strict inclusion and exclusion criteria applied to avoid confounding in these trials. In practice that means multimorbid patients receive treatments which have been shown to be very beneficial in isolated conditions but without an understanding of whether or how they may impact other conditions or treatments. Limited research has investigated the interplay between multimorbid diseases, and few trials have included multimorbid patients. Published articles are limited to those with cancer or focus on the mental health consequences of co-morbid illnesses such as depression and anxiety in cardiac disease [14]. Conversely, the very poor life expectancy of those with serious mental illness has been reported and investigated extensively, helpfully contributing to public health planning [15].

It is vital that researchers, clinicians, and policy makers re-think how research findings can be applied to real-world settings where multimorbidity exists in abundance. In LMICs, research should envision, design and test programs for multimorbid care led by health workers

who are abundant, such as community health workers, peers, and volunteers. In HICs research should elucidate novel approaches to measuring multimorbidity and strengthening primary care of multiple chronic conditions, working towards truly human-centered care which integrates multiple treatment and care approaches. The UK NHS and other large healthcare systems should be well placed to characterize multimorbidity in HICs and provide platforms for research on interventions including drug sparing and care provision.

As is the case with most pandemics, the enormity of the problem is growing exponentially, and global action is required. The warning signs are there, and the trend will continue—the healthcare profession needs to be prepared and poised to act.

## Author Contributions

Wrote the first draft of the manuscript: PD. Contributed to the writing of the manuscript: TB CD PD. Agree with the manuscript's results and conclusions: TB CD PD LGB. All authors have read, and confirm that they meet, ICMJE criteria for authorship.

## References

1. World Health Organization. Invisible Numbers: The true extent of noncommunicable diseases and what do about them. 2022, Sept 21 <https://www.who.int/teams/noncommunicable-diseases/invisible-numbers>. Accessed 10 Mar. 2023.
2. Barnett K, Mercer SW, Norbury M, Watt G, Wyke S, Guthrie B. Epidemiology of multimorbidity and implications for health care, research, and medical education: a cross-sectional study. *Lancet* 2012; 380:37–43. [https://doi.org/10.1016/S0140-6736\(12\)60240-2](https://doi.org/10.1016/S0140-6736(12)60240-2) PMID: 22579043
3. Schiøtz ML, Stockmarr A, Høst D, Glümer C, Frølich A. Social disparities in the prevalence of multimorbidity. A register-based population study. *BMC Public Health* 2017; 17:422. <https://doi.org/10.1186/s12889-017-4314-8> PMID: 28486983
4. Singer M. Introduction to Syndemics: A Systems Approach to Public and Community Health. San Francisco, CA: Jossey-Bass, 2009.
5. van der Aa MJ, van den Broeke JR, Stronks K, Plochg T. Patients with multimorbidity and their experiences with the healthcare process: a scoping review. *J Comorb*. 2017 Jan 27; 7(1):11–21. <https://doi.org/10.15256/joc.2017.7.97> PMID: 29090185
6. Diederichs C, Berger K, Bartels DB. The measurement of multiple chronic diseases—a systematic review on existing multimorbidity indices. *J Gerontol A Biol Sci Med Sci*. 439 2011; 66(3):301–11. <https://doi.org/10.1093/gerona/glq208> PMID: 21112963
7. Ho IS-S, Azcoaga-Lorenzo A, Akbari A, Black C, Davies J, Hodgins P, et al. Examining variation in the measurement of multimorbidity in research: a systematic review of 566 studies. *Lancet Public Health*. 2021; 6(8):e587–e97. [https://doi.org/10.1016/S2468-2667\(21\)00107-9](https://doi.org/10.1016/S2468-2667(21)00107-9) PMID: 34166630
8. MacRae C, McMinn M, Mercer SW, Henderson D, McAllister DA, Ho I, et al. The impact of varying the number and selection of conditions on estimated multimorbidity prevalence: A cross-sectional study using a large, primary care population dataset. *PLoS Med*. 2023 Apr 4; 20(4). <https://doi.org/10.1371/journal.pmed.1004208>
9. Chang CY, Bryazka D, Dieleman JL. Estimating health spending associated with chronic multimorbidity in 2018: An observational study among adults in the United States. *PLoS Med*. 2023 Apr 4; 20(4). <https://doi.org/10.1371/journal.pmed.1004205>
10. Stokes J, Guthrie B, Mercer SW, Rice N, Sutton M. Multimorbidity combinations, costs of hospital care and potentially preventable emergency admissions in England: A cohort study. *PLoS Med*. 2021 Jan 13; 18(1) <https://doi.org/10.1371/journal.pmed.1003514> PMID: 33439870
11. Payne RA. The epidemiology of polypharmacy. *Clin Med (Lond)*. 2016 Oct; 16(5):465–469. <https://doi.org/10.7861/clinmedicine.16-5-465> PMID: 27697812
12. Whitty CJM, MacEwen C, Goddard A, Alderson D, Marshall M, Calderwood C, et al. Rising to the challenge of multimorbidity. *BMJ*. 2020 Jan 6; 368:l6964. <https://doi.org/10.1136/bmj.l6964> PMID: 31907164

13. World Health Organization Integrated Health Services. Technical Series on Safer Primary Care: Multimorbidity. ISBN: 9789241511650 <https://www.who.int/publications/i/item/9789241511650>. Accessed 10 Mar. 2023.
14. Wells A, Reeves D, Heal C, Fisher P, Doherty P, Davies L, et al. Metacognitive therapy home-based self-help for anxiety and depression in cardiovascular disease patients in the UK: A single-blind randomised controlled trial. *PLoS Med*. 2023 Jan 31; 20(1) <https://doi.org/10.1371/journal.pmed.1004161> PMID: [36719886](https://pubmed.ncbi.nlm.nih.gov/36719886/)
15. Public Health England. Severe mental illness (SMI) and physical health inequalities: briefing. 2018 Sept 27. <https://www.gov.uk/government/publications/severe-mental-illness-smi-physical-health-inequalities/severe-mental-illness-and-physical-health-inequalities-briefing>. Accessed 10 Mar. 2023.
